# Supplementary material for: Making Response-Ability: Societal Readiness Assessment for Sustainability Governance
Source: MDPI journal article supplement (doi:10.3390/su15065140), 2023-03-14
Supplement: s1 [file s1]

Table S1: DecarboN8 SoRA Research participants and activities

| Timing                  | Research Participants                                                                                                                    | Research Activity & Analysis                                                                                                                                                                 | No# |
|-------------------------|------------------------------------------------------------------------------------------------------------------------------------------|----------------------------------------------------------------------------------------------------------------------------------------------------------------------------------------------|-----|
| 4x<br>2109-<br>22       | Experts from Transport for the North (TfN), the Climate Change Commission, UK Research Councils and Low-carbon innovation SME            | Periodic reviews of SoRA development with the DecarboN8 Advisory Board, round table discussions of SoRA concept and evolving design, formative evaluation                                    | 5   |
| 7x<br>2109-<br>22       | Stakeholder Reference Group, including members of transport activist groups, local authorities, SME, the Regional Youth Climate Assembly | Stakeholder Reference Group Meetings in the form of creative workshops, experimental assessment of different innovations' SRL, co-design and formative evaluation of SoRA concept and design | 4   |
| Nov-<br>Dec<br>2019     | 100+ researchers, stakeholders from communities, industry, policy                                                                        | Plenary Q&A on DecarboN8 SoRA concept at DecarboN8 Launch Event, informal conversations during workshops                                                                                     | 10  |
| Jan-<br>March<br>2020   | Invited stakeholders from communities, industry, policy, including Lake District National Park Authority, TfN, bus operators, SME        | Creative workshop during Decarbonising Transport – Connecting Carbon Targets to Action event, using SoRA Visioning methods, including scenario building and backcasting.                     | 25  |
| April –<br>June<br>2020 | Researchers from different disciplines                                                                                                   | Round 1 seed project submissions responses to SoRA questions in application form                                                                                                             | 5   |
| July –<br>Sep<br>2020   | Designers, economist, research leads from Connected Places Catapult (CPC)                                                                | Creative workshop on developing SoRA in relation to TRL                                                                                                                                      | 5   |
|                         | Designers and innovation project leads from CPC, Seed project Principal Investigators                                                    | Societal Readiness Salon – experimental joining of SoRA with market readiness assessment, reflective debrief with CPC                                                                        | 12  |
| Oct –<br>Dec<br>2020    | Zero Carbon Cumbria Partnership (ZCCP) Manager, Cumbria Action for Communities Director                                                  | Meeting - discussion of ZCCP's need for SoRA                                                                                                                                                 | 2   |
|                         | Stakeholder Reference Group                                                                                                              | Trial SoRA evaluations written by SRG, reflective debrief                                                                                                                                    | 4   |
|                         | Researchers from different disciplines                                                                                                   | Discussion of SoRA self-evaluations at DecarboN8 Principal Investigator Workshop, reflective debrief                                                                                         | 5   |
| Jan-<br>March<br>2021   | Researchers from different disciplines                                                                                                   | Round 2 seed project responses to SoRA questions in application form                                                                                                                         | 5   |
|                         | 2 members of the Yorkshire and Humber Regional Youth Climate Assembly                                                                    | NERC funded Video Conversation about SoRA<br><a href="https://www.youtube.com/watch?v=znZnBp5n5yc">https://www.youtube.com/watch?v=znZnBp5n5yc</a>                                           | 2   |
| July –<br>Sep<br>2021   | Designers, economist, research leads from CPC                                                                                            | Creative workshop on developing SoRA in relation to TRL                                                                                                                                      | 5   |
|                         | Stakeholders from CPC, ZCCP, Regional Youth Climate Assembly                                                                             | Panel discussion and online creative activity at DecarboN8 Conference, reflective debrief                                                                                                    | 20  |

|                      |                                                                                                                                                    |                                                                                                                                                                |     |
|----------------------|----------------------------------------------------------------------------------------------------------------------------------------------------|----------------------------------------------------------------------------------------------------------------------------------------------------------------|-----|
| Oct –<br>Dec<br>2021 | Researchers from different disciplines                                                                                                             | Principal investigator creative workshop, discussion of five trial SoRA assessments, reflective debrief                                                        | 5   |
|                      | Zero Carbon Cumbria Partnership                                                                                                                    | Creative online SoRA taster workshop                                                                                                                           | 20  |
|                      | Zero Carbon Cumbria Partnership                                                                                                                    | SoRA Visioning online workshop                                                                                                                                 | 11  |
| Oct –<br>Dec<br>2022 | Youth Climate Day participants, Cumbria Development Education Centre (CDEC)                                                                        | Cumbria Mobility Futures creative workshop I, videos available at <a href="https://decarbon8.org.uk/cumbria-2037/">https://decarbon8.org.uk/cumbria-2037/</a>  | 12  |
|                      | Youth Climate Day participants, CDEC                                                                                                               | Cumbria Mobility Futures creative workshop II, videos available at <a href="https://decarbon8.org.uk/cumbria-2037/">https://decarbon8.org.uk/cumbria-2037/</a> | 16  |
|                      | Cumbria Action for Communities Director                                                                                                            | ZCCP SoRA Dashboard questionnaire completion and reflective formative evaluation                                                                               | 1   |
|                      | Cumbria local authorities, National Park Authority, Third Sector Organisations, Copeland Community Climate Monitoring Group, Youth Climate Leaders | Creative workshop at Cumbria 2037 Symposium & Instant Journal Cumbria 2037: Decarbonising Mobility Futures.                                                    | 80  |
| Jan<br>2023          | ZCCP                                                                                                                                               | Formative Evaluation of SoRA prototype                                                                                                                         | 1   |
|                      |                                                                                                                                                    | Total Participants                                                                                                                                             | 254 |
